# Supplementary material for: Performance of the BD-FACS Presto for CD4 count and hemoglobin measurement in a district hospital and rural laboratory in Ghana
Source: PLoS One. 2019 Feb 22;14(2):e0212684. doi: 10.1371/journal.pone.0212684 (PMC6386386; doi:10.1371/journal.pone.0212684)
Supplement: S1 Table — This table includes the study ID numbers for all samples analyzed, and the CD4 count and hemoglobin results from BD Presto, BD FACSCount (CD4 Count) and the Sysmex KX– 21N. (XLSX) [file pone.0212684.s001.xlsx]

## Sheet: Phase1Presto results
Study ID Number (P01-XXX)	Venous Blood (Presto)			Fingerprick (Presto)
	Abs. CD4 count (Presto)	CD4 % (Presto)	Hemoglobin (Presto)	Abs. CD4 count (Presto)	CD4 % (Presto)	Hemoglobin (Presto)
P01-001	122	4.98	13.3	105	4.48	14.1
P01-002	409	25.89	13.3	434	24.53	13.2
P01-003	1615	39.71	11.6	1442	41.01	13.2
P01-004	575	24.17	12.5	493	23.92	10.9
P01-005	180	8.91	10.7	197	8.95	12.3
P01-006	386	14.35	13.8	416	14.41	14.1
P01-007	490	22.5	11.9	NO SAMPLE
P01-008	403	24.44	14.6	439	24.04	15.3
P01-009	384	12.04	6.2	495	12:21	11.9
P01-010	ERROR			1332	34.95	13.4
P01-011	ERROR			673	23.77	8.5
P01-012	873	14.79	10.5	836	13.98	12.7
P01-010	1020	35.27	12.4	NO SAMPLE
P01-011	619	23.28	8	NO SAMPLE
P01-013	1427	35.18	12.3	NO SAMPLE
P01-015	ERROR			ERROR
P01-015-2	846	28.11	8.8	NO SAMPLE
P01-016	883	44.47	10.5	923	43.84	11.2
P01-017	430	29.69	9.6	534	29.62	10.4
P01-018	1114	29.65	11.4	991	29.3	12.4
P01-019	1037	18.53	8.6	995	17.78	9.4
P01-020	1323	43.19	11	1637	46.35	12.2
P01-021	841	35.64	14.1	1094	35.53	16
P01-022	ERROR			ERROR
P01-023	949	36.05	10.6	894	37.78	10.9
P01-024	478	19.81	11.9	555	19.4	11.5
P01-025	447	25.62	13.1	471	1900-01-24 08:24:00	13.9
P01-027	ERROR			619	13.27	8.9
P01-028	501	35.84	12.9	513	35.71	13.3
P01-026	817	30.91	11.7	839	32.47	11.8
P01-027	596	15.6	7.4
P01-029	1595	46.641	11.5	1633	47.58	11.9
P01-030	324	24.21	11.9	330	21.52	12.3
P01-031	1080	33.53	10.7	942	31.38	11
P01-032	ERROR			968	13.11	11
P01-032	ERROR
P01-032	ERROR
P01-034	412	16.11	11.3	398	15.89	11.2
P01-035	835	40.85	9.9	909	40.93	10.8
P01-036	815	30.66	12.5	922	29.52	13.8
P01-037	1097	27.5	9.5	1416	26.09	11.3
P01-038	ERROR			1058	35.93	12.4
P01-038	1068	35.79	11.4
P01-039	1940	55.13	11.9	2018	51.6	13.1
P01-040	627	36.91	11	692	35.95	13.1
P01-041	406	16.65	10.2	425	16.35	11.8
P01-042	798	34.06	11	888	31.51	12.5
P01-043	1441	47.45	13.3	1580	45.7	14.1
P01-044	81	5.42	12.1	103	4.76	11.6
P01-045	406	26.32	10.1	494	26.35	10.7
P01-046	281	5.77	9.5	252	4.85	10
P01-047	723	25.14	10.4	862	26.07	10.9
P01-048	916	24.35	12.4	802	25.18	13
P01-049	415	15.2	10.6	485	15.75	13.6
P01-050	411	38.9	12.2	416	38	13.3
P01-051	181	9.46	8.2	161	11.49	8.5
P01-052	1190	27.94	12.1	1222	38.29	12.9
P01-053	502	19.24	10.4	551	20.07	10.8
P01-054	644	37.1	12	614	33.8	12.4
P01-055	ERROR			ERROR
P01-055	ERROR			ERROR
P01-056	628	44.46	11.9	684	43.39	12.6
P01-057	651	24.71	12.6	763	22.68	12.4
P01-058	825	28.59	13.3	881	28.68	12.1
P01-059	537	10.42	10.1	542	20.07	12
P01-060	824	27.06	11	967	28.03	11.8
P01-061	769	37.3	11.2	859	38.72	10.9
P01-062	761	36.33	16.3	696	34.11	16.2
P01-063	497	28.53	12.3	491	25.93	14.6
P01-064	793	33.5	11.9	812	32.76	12.4
P01-065	49	3.12	10.1	59	3.67	10.7

## Sheet: Phase 1 Control results
Study ID Number (P01-XXX)	Venous Blood (CONTROL)
	Abs. CD4 Count (FACS Count)	Hemoglobin (Sysmex)
P01-001	122	12.9
P01-002	333	11.8
P01-003	1502	11.6
P01-004	478	11.8
P01-005	177	11
P01-006	253	13.3
P01-007	365	10.9
P01-008	348	13.9
P01-009	CLOTTED. NO RESULT	8.8
P01-010	781	8.3
P01-011	550	11.9
P01-013	1391	11.8
P01-012	894	10.7
P01-015	834	9.2
P01-016	896	10.3
P01-017	449	9.9
P01-018	997	11.7
P01-019	856	8.4
P01-020	1277	10.7
P01-021	811	13.9
P01-022	262	11.2
P01-023	767	10.3
P01-024	440	10.8
P01-025	412	12.6
P01-026	713	11.5
P01-027	516	8
P01-028	411	12.7
P01-029	1518	11.3
P01-030	321	10.7
P01-031	1026	10.4
P01-032	ERROR	INSUFFICIENT SAMPLE. NO RESULTS
P01-032	1120
P01-034	368	10.8
P01-035	823	10.4
P01-036	803	12.9
P01-037	1135	9.7
P01-038	1040	11.6
P01-039	1884	11.7
P01-040	574	10.8
P01-041	395	10.7
P01-042	708	10.9
P01-043	1374	12.8
P01-044	93	10.9
P01-045	428	11.9
P01-046	257	10.1
P01-047	802	8.8
P01-048	781	10.3
P01-049	377	9.7
P01-050	388	11.9
P01-051	155	8.1
P01-052	1227	11.5
P01-053	451	9.8
P01-054	592	11.9
P01-055	322	9.4
P01-056	579	11.2
P01-057	595	10.9
P01-058	805	11.2
P01-059	502	10.4
P01-060	847	10.8
P01-061	846	11.2
P01-062	746	15.4
P01-063	495	12.2
P01-064	755	11.4
P01-065	31	9.4

## Sheet: Phase 2 Presto
Study ID Number (P02-XXX)	Venous Blood (Presto)			Capillary (Presto)
	Abs. CD4 count (Presto)	CD4 % (Presto)	Hemoglobin (Presto)	Abs. CD4 count (Presto)	CD4 % (Presto)	Hemoglobin (Presto)
P02-001	113	7.79	8.9
P02-002	596	22.57	11.7
P02-003	n/a	n/a	11.3
P02-004	954	39.49	16.2
P02-005	239	20.39	9.1
P02-006	519	29.67	13.4
P02-007	548	23.08	12.4
P02-008	n/a	n/a	12.6
P02-009	124	15.61	9.1
P02-010	315	14.4	14.6
P02-011	87	7.23	9.7
P02-012	1188	36.36	13.1
P02-013	276	11.36	10.6
P02-014	753	25.15	15.3
P02-015	383	18.09	9.6
P02-016	511	16.1	10
P02-017	584	24.66	11.3
P02-018	156	14.63	10.2
P02-019	948	38.67	14.4
P02-020	978	33.86	11
P02-021	429	22.18	11.4
P02-022	1245	28.2	14
P02-023	250	27.84	10.9
P02-024	721	25.95	8.6
P02-025	394	14.29	11
P02-026	116	8.17	7.9
P02-027	844	36.6	12.3
P02-028	144	5.63	7.6
P02-029	703	29.05	12.8
P02-030	736	38.58	11.2
P02-031	1110	39.15	10.9
P02-032	298	28.5	10.2
P02-033	484	14.19	9.4
P02-034	618	18.57	11.8
P02-035	1371	46.2	13.9
P02-036	1407	37.54	13.1
P02-037	696	25.47	11.6
P02-038	917	27.83	10.9
P02-039	799	45.64	12.1
P02-040	331	13.32	10.2
P02-041	863	41.04	10.5	875	43.12	10.6
P02-042	834	29.14	9.9	823	28.17	10.2
P02-043	416	31.99	6.9	421	30.77	7.9
P02-044	813	35.43	10.3	988	35.19	11
P02-045	517	14.68	8.8	480	15.88	7.4
P02-046	817	47.29	9	940	54.36	9.8
P02-047	951	51.48	9.1	1100	51.76	10.7
P02-048	1525	52.03	7	1480	53.73	8
P02-049	834	46.39	9.8	976	44.63	10.1
P02-050	694	51.07	12.6	589	53.64	13.1
P02-051	602	49	14.5	607	48.87	13.7
P02-052	1262	42.33	12	1351	43.85	13.6
P02-053	1125	52.82	14.3	1152	52.88	14.2

## Sheet: Phase 2 Control
Study ID Number (P01-XXX)	Abs. CD4 Count (FACS Count)	Hemoglobin (Sysmex): g/dl
P02-001	142	12.4
P02-002	650	12
P02-003	6	10.5
P02-004	982	15.6
P02-005	242	9.2
P02-006	486	13.1
P02-007	483	11.3
P02-008	16	11.7
P02-009	105	10.3
P02-010	356	14.4
P02-011	73	8.7
P02-012	1038	12.4
P02-013	233	10.3
P02-014	677	13.8
P02-015	354	9.5
P02-016	419	10
P02-017	497	11.1
P02-018	138	9.4
P02-019	761	13.5
P02-020	753	11.1
P02-021	357	11.2
P02-022	1017	13.9
P02-023	117	10.8
P02-024	729	8.1
P02-025	275	10.6
P02-026	113	7.9
P02-027	840	11.4
P02-028	4	6.9
P02-029	825	12.2
P02-030	709	11
P02-031	1213	10.7
P02-032	147	10.7
P02-033	437	10
P02-034	482	11.1
P02-035	1391	13.4
P02-036	1142	12.1
P02-037	504	11.5
P02-038	792	11.8
P02-039	707	11.1
P02-040	297	11.2
P02-041	765	10.5
P02-042	650	9.7
P02-046	737	9.3
P02-047	810	9.5
P02-048	1120	7.8
P02-049	668	10
P02-050	639	12.8
P02-051	527	12.4
P02-052	1103	13.2
P02-053	1107	14.4
**043-045 were not included
